**Title:** Detection of hepatocellular carcinoma methylation markers in salivary DNA

**Authors:** Catherine Mezzacappa<sup>1</sup>, Zhanwei Wang<sup>2</sup>, Lingeng Lu<sup>3</sup>, Harvey Risch<sup>4</sup>, Tamar Taddei<sup>1,4</sup>, Herbert Yu<sup>2,3</sup>

**Affiliations:**

1 Yale School of Medicine, Department of Internal Medicine

2 University of Hawai'i Cancer Consortium

3 Yale School of Public Health, Department of Chronic Disease Epidemiology

4 VA Connecticut Healthcare System

**Funding sources:** NIDDK T32 DK007356, NCI/NIH R01 CA 138698

**Background** Alterations to DNA methylation have been identified in both hepatocellular carcinoma (HCC) tumor and circulating DNA from affected individuals. These markers have potential utility in HCC screening. Adherence to HCC screening is poor and acceptable HCC screening tests are needed.

**Methods** A feasibility study was performed on a subset of case patients and control subjects from a prior study of risk factors for HCC. Case patients (n=12) included adults aged 47-85 years with a first diagnosis of HCC between 2011-2016 and without viral hepatitis. Control subjects (n=12) were matched on age, sex, and state of residence. Participants provided saliva samples for DNA genotyping. Log fold change in salivary DNA methylation at 1359 CpG sites representing 25 candidate genes previously associated with HCC was compared across case patients and control subjects.

**Results** The quantity of DNA ranged from 9.65 $\mu$ g to 257.79 $\mu$ g. The purity of DNA isolates was good, with mean OD260/280 ratio 1.78 (s.d. 0.14). Of 25 candidate genes, 16 had at  $\geq 1$  CpG site with detectable differences in methylation across HCC case patients and control subjects. Sites differentially methylated in HCC case patients included genes encoding tumor suppressors (PRDM2, RUNX3, p15/16, RASSF1/5), regulators of cell cycle progression (DAPK1, TP73), and DNA repair (MGMT, GSTP1). No associations met the significance threshold  $3.7 \times 10^{-5}$  required for multiple comparisons.

**Conclusions** Salivary DNA may be a feasible alternative to blood samples in the era of novel DNA-based screening tests for HCC. The ease of saliva-based testing supports further investigation of its potential.

## Background

Hepatocellular carcinoma (HCC) is a leading cause of mortality in patients with cirrhosis. The epidemiology of HCC is changing with the availability of effective treatments for hepatitis C virus and the rising prevalence of metabolic disease and its phenotype in the liver, metabolic dysfunction-associated steatotic liver disease (MASLD). While HCC rates in MASLD are lower than those observed in other liver diseases including alcohol and HCV-associated cirrhosis, the fraction of HCC cases attributable to MASLD is on the rise. (1, 2)

Currently, the American Association for the Study of Liver Diseases (AASLD) recommends offering screening for HCC with an ultrasound or contrast-enhanced CT or MRI and a serum alpha fetoprotein (AFP) every 6 months when HCC risk is at least 1.5% per year, which includes persons with established cirrhosis and chronic hepatitis B virus infection (3). Guidelines do not recommend screening in patients with MASLD without cirrhosis, and HCC risk stratification in this large population remains a clinical and population health dilemma (4). The sensitivity and specificity of ultrasound and AFP for HCC screening are sub-optimal and efforts are underway to develop novel biomarkers for use in HCC screening, including combination DNA methylation assays (5, 6).

Numerous epigenetic alterations have been identified in HCC tissue (7, 8). Prior research has analyzed HCC tumor (8-14) or compared blood samples from persons with HCC to persons with chronic viral hepatitis (15, 16). Circulating tumor DNA (ctDNA) in peripheral blood samples is undergoing evaluation as a screening test for HCC (5, 6). A recent study evaluated urinary ctDNA and found a combination of ctDNA markers from urine added to the accuracy of HCC screening among persons with low serum AFP (17). Saliva is more comfortable and easier for patients to collect than other body fluids and may serve as a more acceptable test to perform on a repeated basis for screening purposes (18-20).

Saliva has been used to identify DNA from head and neck cancers (21) and lung cancers (22). Tumors in sites not in communication with the oropharynx have not been as deeply examined, but the close interactions between capillary beds and salivary glands suggest examining ctDNA in saliva is achievable with adequate measures to ensure sample quality (23-25). The aim of this study was to evaluate the feasibility of detecting aberrant DNA methylation patterns previously identified in HCC tumor and peripheral blood in saliva.

## Methods

This is an observational feasibility study performed on a convenience sample of individuals with adequate stored DNA samples identified from a previously conducted case-control study of genetic and environmental risk factors for HCC (26). Case patients included in this study were individuals aged 47-85 years with a first diagnosis of HCC and without a history of viral hepatitis diagnosed between January 2011 and February 2016 in Connecticut, New Jersey, or New York City. Control subjects were identified using random digit dialing and included adults without any form of cancer and matched to case patients on age, sex, and state of residence. Additional details regarding participant recruitment are available in Shen et al. 2020 (26). All study participants completed structured questionnaires by telephone interview and were instructed to mail in saliva samples collected with commercial kits for both DNA genotyping and HCV antibody assay. The saliva sample for genotyping was collected with the Saliva Self-Collection Kit (OG-250, DNA Genotek, Ottawa, Ontario, Canada). Individuals with HCC

were recruited to the original case-control study at the time of first HCC diagnosis, and a saliva sample was collected from each enrolled HCC case shortly after diagnosis and prior to HCC treatment.

Information on history of HCV was ascertained through both questionnaire inquiry and saliva testing. Among individuals with adequate stored DNA for methylation microarray analysis, 12 case patients and 12 control subjects matched on sex, race, and ethnicity without a history of viral hepatitis were selected from the original study for analysis. Participants were selected such that half (6 case patients and 6 control subjects) reported a diagnosis of metabolic dysfunction associated steatotic liver disease (MASLD).

Candidate genes were identified from existing literature on differences in DNA methylation observed in HCC tumor and blood. Ultimately, 25 candidate genes were selected for comparison and are demonstrated in **Table 1**. The log-fold change in DNA methylation at 1359 CpG sites representing these 25 candidate genes was compared across HCC status in the total sample and in the MASLD subset.

Saliva samples collected for genotyping were processed according to manufacturer instructions (27). The concentration of DNA in the supernatant, total mass of DNA, and purity of the nucleic acids were assessed for each sample. Nucleic acid purity was measured using the ratio of absorbance at 260 nm and 280 nm using Thermo Fisher Scientific NanoDrop 1000 spectrophotometry (28). A ratio of approximately 1.8 is accepted as “pure” for DNA (28, 29).

After sodium bisulfite conversion (which converts unmethylated cytosine residues to uracil residues), the methylation profile of salivary DNA was assessed using Illumina Infinium MethylationEPIC (850k) BeadChip methylation arrays. These arrays cover more than 850,000 CpG sites genome-wide. Samples were processed according to the manufacturer instructions (ref). Briefly, The Zymo Research EZ DNA methylation kit was used for bisulfate conversion of genomic DNA. 1000ng (1 $\mu$ g) of DNA was diluted in 22  $\mu$ l of elution buffer and the DNA was denatured and underwent bisulfite conversion per manufacturer instructions. Then, 20  $\mu$ l of the bisulfate-converted DNA solution was used for whole genome amplification, fragmentation, precipitation, and resuspension prior to hybridization onto the BeadChips. The Illumina iScan SQ System was used to scan BeadChips and create image files, which were extracted using R package minfi. The detectionP function was used to filter any samples and probes not meeting quality control metrics. All samples passed standard quality control metrics. Any probe that failed in  $\geq 1$  sample was labeled as not interpretable and removed from the analytic dataset. The data were normalized using background subtraction and normalization to internal controls methods. Internal control beads in each channel were used to set the background probe intensity level at the 5<sup>th</sup> percentile of the negative controls in the given channel. This background intensity was then subtracted from probe intensities in the same channel (to a minimum of 0). The probe intensity in each sample was then normalized to the probe intensity derived from these internal control probes for all samples. Potential batch effects are addressed through this normalization to internal controls. This process is summarized in Figure 1. Resultant  $\beta$  values for each CpG range from 0 (fully unmethylated) to 1 (fully methylated). These are transformed to the logit of the  $\beta$  values, known as the  $M$  value, and the log<sub>2</sub>-fold change in  $M$  values comparing HCC case patients to control subjects was calculated and compared using Limma’s differential analysis, which uses moderated t-tests. This moderated t-test utilizes information from all CpG sites to inform the variance estimation for each individual

site, which improves the reliability of the variance estimates for statistical inference. To account for multiple comparisons, the significance threshold was set at  $3.7 \times 10^{-5}$  (0.05/1359).

## Results

The mean OD260/280 ratio of the DNA samples was 1.78 (s.d. 0.14). The quantity of DNA varied across samples and ranged from 9.65  $\mu\text{g}$  to 257.785  $\mu\text{g}$ . (**Table 2**) All samples had adequate quantity of DNA for methylation microarray assays. Of 850,000 total CpG probes, 828,924 (97.5%) had interpretable probe intensities.

Of the 25 candidate genes identified, 16 had at least one CpG site with a detectable difference in DNA methylation. At the gene level, we would expect between 1-2 genes to differ by chance alone assuming an alpha of 0.05 ( $0.05 \times 25$ ).

Individual CpG sites differentially methylated in HCC case patients included genes encoding tumor suppressors (APC, RUNX3, RAR- $\beta$ , PRDM2, SFRP1, RASSF1A, RASSF5), regulators of cell cycle progression and death (DAPK1, TP73), and DNA repair (MGMT, GSTP1, MLH1). (**Table 3**) The strongest suggestive associations were observed for CpG sites located in NKX6-2, a gene involved in tissue differentiation (log-fold difference in methylation 1.50,  $p = 8.8 \times 10^{-4}$ ), SFRP1 (log-fold difference in methylation 1.52,  $p = 3.5 \times 10^{-3}$ ), and MGMT (log-fold difference in methylation 1.36,  $p = 6.3 \times 10^{-3}$ ). Hypermethylation, demonstrated by these log-fold difference values  $> 1$  comparing HCC case patients to control subjects, downregulates gene transcription. None of the associations measured met the significance threshold of  $3.7 \times 10^{-5}$  required to adjust for 1359 comparisons.

## Discussion

Our study showed that saliva samples contained DNA of adequate volume and quality to detect methylation at CpG sites previously associated with HCC. We identified three CpG sites with suggestive increases in methylation in persons with HCC compared to control subject, which would downregulate expression of the encoded tissue differentiation, tumor suppression, and DNA repair proteins. Although this small study lacks the sample size to compare methylation patterns as biomarkers of disease or to adjust for potential confounders, it is nevertheless an important demonstration of the feasibility of using saliva in the next generation of DNA-based cancer screening.

In the case of colorectal cancer, the addition of screening tests that patients self-collect at home and deliver by mail (i.e. fecal immunohistochemistry testing or FIT, Cologuard) improved screening rates among persons not up to date with screening by colonoscopy (30). The benefits of at-home test collection may be greater in rural communities with limited access to health facilities (31, 32). Given these demonstrated benefits of at-home screening tests and the ease of saliva collection for patients (18-20), this feasibility study provides preliminary evidence that salivary DNA methylation warrants further study.

Many biomarkers currently under study for prognostication after HCC diagnosis, development of targeted treatments, and screening for HCC in persons known to be at risk utilize epigenetic markers (5, 6, 33). There is also potential for cfDNA methylation markers to inform HCC risk stratification prior to cancer development. One study demonstrated the feasibility of such an application of cfDNA by analyzing repeated blood samples collected prior to HCC diagnosis in a Taiwanese cohort and identifying aberrant methylation in serum DNA

between 1 and 9 years prior to HCC diagnosis (34). In a study of genome-wide DNA methylation and copy number variation in regenerative nodules within individual livers, another study found that nodules demonstrating aggressive features were enriched for epigenetic changes associated with liver cancer, further supporting the possibility of using DNA methylation as a marker of early carcinogenesis (35).

Genetic and cellular material from liver parenchyma and tumor enters circulating blood through rich networks of hepatic sinusoids, which filter toxins and nutrients from blood reaching the liver through the portal vein and subsequently deliver blood to the systemic circulation through the hepatic veins. Both DNA from tumor and from at-risk liver parenchyma, which may exhibit more diffuse aberrations in DNA methylation as described above, may contribute to circulating DNA in the bloodstream and enter the saliva through the close interactions between capillary beds and salivary glands (23-25).

Importantly, in this study we were not able to assess potential confounding of the association between DNA methylation in saliva and HCC status by tobacco and alcohol consumption. Both of these exposures are associated with salivary DNA methylation changes and have well established associations with multiple cancers (36, 37).

As the population at-risk of HCC changes over time, HCC risk stratification will encompass a more diverse patient population and will need to become more personalized (38). If targeted panels of methylation markers can be identified and produced at-scale for specific populations, saliva-based DNA methylation testing may be a practical way to leverage these scientific advances in clinical care.

### Testable hypotheses and direction for future research

Multiple testable hypotheses are generated from this preclinical exploratory work. The overarching aims of future research should be to identify potentially useful biomarkers for further study from salivary DNA and estimate their accuracy (true positive rate, false positive rate, and receiver operating characteristic curve). (39) Thus, early future research on salivary DNA methylation as a potential tool for HCC screening should center on testing the following hypotheses: **Hypothesis 1:** Salivary cfDNA methylation patterns accurately differentiate between individuals with HCC and individuals without HCC, and **Hypothesis 2:** The pattern of DNA methylation changes associated with HCC status is not uniform across etiology of underlying liver disease. If the above hypotheses are supported by early evidence, additional clinical factors impacting biomarker performance should be assessed retrospectively in longitudinal biorepositories.

**Table 1.** Candidate genes identified for comparison across HCC case patients and control subjects

| Gene    | Function                                       |
|---------|------------------------------------------------|
| APC     | Tumor suppressor                               |
| CDH1    | E-cadherin                                     |
| CDKN2A  | Tumor suppressor                               |
| CDKN2B  | Tumor suppressor                               |
| DAPK1   | Programmed cell death                          |
| DRD4    | Dopamine receptor                              |
| EFNB2   | Epithelial-mesenchymal signaling               |
| FAM196A | Rho GTPase                                     |
| FOXE3   | Transcription factor                           |
| GSTP1   | Metabolic injury                               |
| IGF2    | Growth factor                                  |
| MGMT    | DNA repair                                     |
| MLH1    | DNA repair                                     |
| NKX6-2  | Transcription factor, cellular differentiation |
| PRDM2   | Tumor suppressor                               |
| RARB    | Nuclear thyroid hormone receptor               |
| RASSF1  | Tumor suppressor                               |
| RASSF5  | Tumor suppressor                               |
| RUNX3   | Transcription factor                           |
| SFRP1   | Wnt signaling modulator                        |
| SFRP5   | Wnt signaling modulator                        |
| SOCS1   | STAT induced STAT inhibitor                    |
| TBX15   | Transcription factor                           |
| TP73    | p53 family transcription factor                |
| WIF1    | Wnt inhibitor, cell cycle progression          |

**Table 2.** Sample characteristics

| Characteristic <sup>a</sup> | Total sample       | HCC                | No HCC             |
|-----------------------------|--------------------|--------------------|--------------------|
| Age (median)                | 63 (60 – 67)       | 67 (65 – 69)       | 59 (55 – 62)       |
| Male sex                    | 24 (100%)          | 12 (100%)          | 12 (100%)          |
| Non-Hispanic White race     | 24 (100%)          | 12 (100%)          | 12 (100%)          |
| College or more             | 17 (70.8%)         | 7 (58.3%)          | 10 (83.3%)         |
| BMI (median)                | 29.8 (25.5 – 33.1) | 30.8 (28.5 – 33.1) | 26.7 (24.5 – 33.5) |
| Diagnosed with MASLD        | 12 (50.0%)         | 6 (50.0%)          | 6 (50.0%)          |
| Any cigarette smoking       | 15 (62.5%)         | 10 (83.3%)         | 5 (41.7%)          |
| Any alcohol use             | 17 (70.8%)         | 11 (91.7%)         | 6 (50.0%)          |

a Presented as n (%) except for age and BMI, which are presented as median (interquartile range)

**Table 3. Concentration, quantity, and quality of DNA isolates**

| <b>Sample</b> | <b>Concentration DNA<br/>(ng DNA/<math>\mu</math>L)</b> | <b>Total DNA<br/>(<math>\mu</math>g)</b> | <b>Nucleic acid purity<br/>OD260/280</b> |
|---------------|---------------------------------------------------------|------------------------------------------|------------------------------------------|
| 1             | 45.77                                                   | 22.89                                    | 1.69                                     |
| 2             | 233.77                                                  | 116.90                                   | 1.89                                     |
| 3             | 23.36                                                   | 11.68                                    | 1.65                                     |
| 4             | 278.84                                                  | 139.42                                   | 1.85                                     |
| 5             | 287.95                                                  | 143.98                                   | 1.8                                      |
| 6             | 196.54                                                  | 98.27                                    | 1.75                                     |
| 7             | 229.35                                                  | 114.68                                   | 1.69                                     |
| 8             | 337.58                                                  | 168.79                                   | 1.97                                     |
| 9             | 515.57                                                  | 257.79                                   | 1.76                                     |
| 10            | 165.94                                                  | 82.97                                    | 1.75                                     |
| 11            | 356.03                                                  | 178.02                                   | 1.8                                      |
| 12            | 108.99                                                  | 54.50                                    | 1.32                                     |
| 13            | 291.79                                                  | 145.90                                   | 1.87                                     |
| 14            | 19.3                                                    | 9.65                                     | 1.73                                     |
| 15            | 117.34                                                  | 58.67                                    | 1.59                                     |
| 16            | 323.46                                                  | 161.73                                   | 1.82                                     |
| 17            | 265.78                                                  | 132.89                                   | 1.79                                     |
| 18            | 303.46                                                  | 151.73                                   | 1.73                                     |
| 19            | 428.64                                                  | 214.32                                   | 1.83                                     |
| 20            | 313.28                                                  | 156.64                                   | 1.86                                     |
| 21            | 328.56                                                  | 164.3                                    | 1.94                                     |
| 22            | 88.32                                                   | 44.2                                     | 1.94                                     |
| 23            | 143.21                                                  | 71.605                                   | 1.95                                     |
| 24            | 125.25                                                  | 62.625                                   | 1.81                                     |
| <b>Mean</b>   | <b>230.34</b>                                           | <b>115.17</b>                            | <b>1.78</b>                              |
| <b>S.D.</b>   | <b>128.92</b>                                           | <b>64.46</b>                             | <b>0.14</b>                              |

**Table 4. Differences in DNA methylation by gene and CpG site**

| Gene   | CpG        | Cases  |        | Controls |        | Fold difference |
|--------|------------|--------|--------|----------|--------|-----------------|
|        |            | Beta   | M      | Beta     | M      |                 |
| PRDM2  | cg23813012 | 0.0289 | -5.099 | 0.0358   | -4.788 | 0.732           |
| PRDM2  | cg10503751 | 0.0842 | -3.461 | 0.0982   | -3.218 | 0.784           |
| PRDM2  | cg15568145 | 0.8415 | 2.426  | 0.8127   | 2.139  | 1.332           |
| PRDM2  | cg16652739 | 0.7983 | 2.028  | 0.7583   | 1.666  | 1.436           |
| PRDM2  | cg13634713 | 0.0594 | -3.995 | 0.0452   | -4.542 | 1.729           |
| RUNX3  | cg26421310 | 0.0589 | -4.019 | 0.0794   | -3.594 | 0.654           |
| RUNX3  | cg12459932 | 0.9370 | 3.907  | 0.9276   | 3.694  | 1.237           |
| RUNX3  | cg26018544 | 0.7912 | 1.933  | 0.7656   | 1.715  | 1.244           |
| RUNX3  | cg13759925 | 0.8317 | 2.332  | 0.7965   | 1.986  | 1.414           |
| RUNX3  | cg27095256 | 0.0428 | -4.522 | 0.0320   | -5.003 | 1.618           |
| RARB   | cg12125972 | 0.7966 | 1.991  | 0.8303   | 2.322  | 0.718           |
| RARB   | cg16525059 | 0.7762 | 1.801  | 0.7272   | 1.450  | 1.421           |
| RARB   | cg02687109 | 0.7309 | 1.482  | 0.6734   | 1.054  | 1.535           |
| RARB   | cg03481274 | 0.0889 | -3.412 | 0.0633   | -3.980 | 1.765           |
| SFRP1  | cg10406295 | 0.0415 | -4.556 | 0.0557   | -4.141 | 0.660           |
| SFRP1  | cg13398291 | 0.0741 | -3.684 | 0.0556   | -4.103 | 1.521           |
| SFRP1  | cg13154925 | 0.5821 | 0.483  | 0.5084   | 0.044  | 1.551           |
| CDKN2A | cg12840719 | 0.0947 | -3.304 | 0.0751   | -3.670 | 1.443           |
| CDKN2B | cg19233179 | 0.0686 | -3.881 | 0.0497   | -4.272 | 1.478           |
| RASSF5 | cg18328206 | 0.0430 | -4.543 | 0.0544   | -4.171 | 0.689           |
| RASSF1 | cg27149285 | 0.0348 | -4.825 | 0.0278   | -5.145 | 1.377           |
| DAPK1  | cg20401521 | 0.0325 | -4.919 | 0.0395   | -4.632 | 0.751           |
| DAPK1  | cg18387231 | 0.8412 | 2.421  | 0.8097   | 2.103  | 1.374           |
| DAPK1  | cg05365878 | 0.8687 | 2.747  | 0.8403   | 2.423  | 1.383           |
| TP73   | cg06996273 | 0.2369 | -1.825 | 0.3086   | -1.195 | 0.532           |
| TP73   | cg25885108 | 0.1205 | -2.890 | 0.1410   | -2.624 | 0.766           |
| MGMT   | cg20778669 | 0.7940 | 1.978  | 0.8383   | 2.400  | 0.656           |
| MGMT   | cg20537325 | 0.8923 | 3.079  | 0.9133   | 3.433  | 0.702           |
| MGMT   | cg18651291 | 0.8965 | 3.126  | 0.9149   | 3.462  | 0.714           |
| MGMT   | cg18485261 | 0.8291 | 2.284  | 0.8116   | 2.110  | 1.190           |
| MGMT   | cg11019008 | 0.7125 | 1.317  | 0.6845   | 1.120  | 1.218           |
| MGMT   | cg18502933 | 0.8097 | 2.098  | 0.7861   | 1.887  | 1.236           |
| MGMT   | cg13272119 | 0.7684 | 1.744  | 0.7403   | 1.519  | 1.252           |
| MGMT   | cg24810646 | 0.8783 | 2.866  | 0.8535   | 2.555  | 1.364           |
| MGMT   | cg24755725 | 0.8461 | 2.477  | 0.8130   | 2.145  | 1.394           |
| MGMT   | cg17083390 | 0.8747 | 2.834  | 0.8457   | 2.474  | 1.433           |

|        |            |        |        |        |        |       |
|--------|------------|--------|--------|--------|--------|-------|
| MGMT   | cg04271445 | 0.7595 | 1.674  | 0.7088 | 1.305  | 1.445 |
| MGMT   | cg00904483 | 0.7984 | 2.020  | 0.7487 | 1.613  | 1.502 |
| MGMT   | cg18453665 | 0.7562 | 1.652  | 0.6965 | 1.224  | 1.534 |
| GSTP1  | cg23725454 | 0.1160 | -3.001 | 0.1425 | -2.612 | 0.677 |
| GSTP1  | cg26250609 | 0.0267 | -5.240 | 0.0201 | -5.710 | 1.601 |
| MLH1   | cg04841293 | 0.0404 | -4.589 | 0.0332 | -4.873 | 1.328 |
| NKX6-2 | cg03905847 | 0.1268 | -2.881 | 0.1768 | -2.289 | 0.553 |
| NKX6-2 | cg01384488 | 0.1078 | -3.060 | 0.0842 | -3.465 | 1.500 |
| NKX6-2 | cg08441806 | 0.1081 | -3.107 | 0.0808 | -3.550 | 1.557 |
| TBX15  | cg08857095 | 0.7334 | 1.465  | 0.7586 | 1.661  | 0.822 |
| TBX15  | cg27517681 | 0.2236 | -1.856 | 0.1742 | -2.262 | 1.501 |
| DRD4   | cg00556112 | 0.0539 | -4.145 | 0.0451 | -4.424 | 1.321 |
| DRD4   | cg03855291 | 0.4116 | -0.536 | 0.3462 | -0.929 | 1.481 |

**Table 5. Number of CpG methylation sites with potential differences detected across HCC status by candidate gene and function**

| <b>Function</b>                  | <b>Gene</b>             | <b>Number of differentially methylated CpG sites<sup>a</sup></b> |
|----------------------------------|-------------------------|------------------------------------------------------------------|
| <b>Tumor suppressor</b>          | <b>PRDM2</b>            | 5                                                                |
|                                  | <b>RUNX3</b>            | 5                                                                |
|                                  | <b>RARB</b>             | 4                                                                |
|                                  | <b>SFRP1</b>            | 3                                                                |
|                                  | <b>CDKN2A (p16/p14)</b> | 1                                                                |
|                                  | <b>CDKN2B (p16/p14)</b> | 1                                                                |
|                                  | <b>RASSF5</b>           | 1                                                                |
|                                  | <b>RASSF1</b>           | 1                                                                |
| <b>Cell cycle regulation</b>     | <b>DAPK1</b>            | 3                                                                |
|                                  | <b>TP73</b>             | 2                                                                |
| <b>DNA protection and repair</b> | <b>MGMT</b>             | 13                                                               |
|                                  | <b>GSTP1</b>            | 2                                                                |
|                                  | <b>MLH1</b>             | 1                                                                |
| <b>Tissue differentiation</b>    | <b>NKX6-2</b>           | 3                                                                |
|                                  | <b>TBX15</b>            | 2                                                                |
| <b>Other</b>                     | <b>DRD4</b>             | 2                                                                |

<sup>a</sup>Not corrected for multiple comparisons.

## Figure Legend.

### Figure 1. Visual summary of sample identification and DNA quality control

### Figure 2. Log-fold difference in DNA methylation by gene function, gene, and CpG site

The y-axis is set at a value of 1. Bars above 1 are CpG sites that, on average, demonstrated an increase in methylation in cases of hepatocellular carcinoma compared to controls. Bars below 1 are CpG sites that, on average, demonstrated a decrease in methylation in cases of hepatocellular carcinoma compared to controls. The CpG sites are organized by gene function, with gene name along the x-axis below the CpG site label.

## References

1. Younossi Z, Stepanova M, Ong JP, Jacobson IM, Bugianesi E, Duseja A, et al. Nonalcoholic Steatohepatitis Is the Fastest Growing Cause of Hepatocellular Carcinoma in Liver Transplant Candidates. *Clin Gastroenterol Hepatol*. 2019;17(4):748-55 e3.
2. El-Serag HB, Kanwal F. Epidemiology of hepatocellular carcinoma in the United States: where are we? Where do we go? *Hepatology*. 2014;60(5):1767-75.
3. Singal AG, Llovet JM, Yarchoan M, Mehta N, Heimbach JK, Dawson LA, et al. AASLD Practice Guidance on prevention, diagnosis, and treatment of hepatocellular carcinoma. *Hepatology*. 2023;78(6):1922-65.
4. Loomba R, Lim JK, Patton H, El-Serag HB. AGA Clinical Practice Update on Screening and Surveillance for Hepatocellular Carcinoma in Patients With Nonalcoholic Fatty Liver Disease: Expert Review. *Gastroenterology*. 2020;158(6):1822-30.
5. Chalasani NP, Porter K, Bhattacharya A, Book AJ, Neis BM, Xiong KM, et al. Validation of a Novel Multitarget Blood Test Shows High Sensitivity to Detect Early Stage Hepatocellular Carcinoma. *Clin Gastroenterol Hepatol*. 2022;20(1):173-82 e7.
6. Singal AG, Haaland B, Parikh ND, Ozbay AB, Kirshner C, Chakankar S, et al. Comparison of a multitarget blood test to ultrasound and alpha-fetoprotein for hepatocellular carcinoma surveillance: Results of a network meta-analysis. *Hepatol Commun*. 2022;6(10):2925-36.
7. Zhang C, Li J, Huang T, Duan S, Dai D, Jiang D, et al. Meta-analysis of DNA methylation biomarkers in hepatocellular carcinoma. *Oncotarget*. 2016;7(49):81255-67.
8. Villanueva A, Portela A, Sayols S, Battiston C, Hoshida Y, Mendez-Gonzalez J, et al. DNA methylation-based prognosis and epidrivers in hepatocellular carcinoma. *Hepatology*. 2015;61(6):1945-56.
9. Kuramoto J, Arai E, Tian Y, Funahashi N, Hiramoto M, Nammo T, et al. Genome-wide DNA methylation analysis during non-alcoholic steatohepatitis-related multistage hepatocarcinogenesis: comparison with hepatitis virus-related carcinogenesis. *Carcinogenesis*. 2017;38(3):261-70.
10. Tian Y, Arai E, Makiuchi S, Tsuda N, Kuramoto J, Ohara K, et al. Aberrant DNA methylation results in altered gene expression in non-alcoholic steatohepatitis-related hepatocellular carcinomas. *J Cancer Res Clin Oncol*. 2020;146(10):2461-77.
11. Zheng Y, Huang Q, Ding Z, Liu T, Xue C, Sang X, et al. Genome-wide DNA methylation analysis identifies candidate epigenetic markers and drivers of hepatocellular carcinoma. *Brief Bioinform*. 2018;19(1):101-8.
12. Shen J, Wang S, Zhang YJ, Kappil M, Wu HC, Kibriya MG, et al. Genome-wide DNA methylation profiles in hepatocellular carcinoma. *Hepatology*. 2012;55(6):1799-808.
13. Cheng J, Wei D, Ji Y, Chen L, Yang L, Li G, et al. Integrative analysis of DNA methylation and gene expression reveals hepatocellular carcinoma-specific diagnostic biomarkers. *Genome Med*. 2018;10(1):42.
14. Ammerpohl O, Pratschke J, Schafmayer C, Haake A, Faber W, von Kampen O, et al. Distinct DNA methylation patterns in cirrhotic liver and hepatocellular carcinoma. *Int J Cancer*. 2012;130(6):1319-28.
15. Sun FK, Fan YC, Zhao J, Zhang F, Gao S, Zhao ZH, et al. Detection of TFPI2 methylation in the serum of hepatocellular carcinoma patients. *Dig Dis Sci*. 2013;58(4):1010-5.

16. Ji XF, Fan YC, Gao S, Yang Y, Zhang JJ, Wang K. MT1M and MT1G promoter methylation as biomarkers for hepatocellular carcinoma. *World J Gastroenterol*. 2014;20(16):4723-9.
17. Kim AK, Hamilton JP, Lin SY, Chang TT, Hann HW, Hu CT, et al. Urine DNA biomarkers for hepatocellular carcinoma screening. *Br J Cancer*. 2022;126(10):1432-8.
18. Schmetzer C, Vogt E, Stellar L, Godonou ET, Liphardt AM, Muehlensiepen F, et al. Self-collection of capillary blood and saliva to determine COVID-19 vaccine immunogenicity in patients with immune-mediated inflammatory diseases and health professionals. *Front Public Health*. 2022;10:994770.
19. Tivey A, Church M, Rothwell D, Dive C, Cook N. Circulating tumour DNA - looking beyond the blood. *Nat Rev Clin Oncol*. 2022;19(9):600-12.
20. Brooks PJ, Malkin EZ, De Michino S, Bratman SV. Isolation of salivary cell-free DNA for cancer detection. *PLoS One*. 2023;18(5):e0285214.
21. Sayal L, Hamadah O, Almasri A, Idrees M, Thomson P, Kujan O. Saliva-based cell-free DNA and cell-free mitochondrial DNA in head and neck cancers have promising screening and early detection role. *J Oral Pathol Med*. 2023;52(1):29-36.
22. Li F, Wei F, Huang WL, Lin CC, Li L, Shen MM, et al. Ultra-Short Circulating Tumor DNA (usctDNA) in Plasma and Saliva of Non-Small Cell Lung Cancer (NSCLC) Patients. *Cancers (Basel)*. 2020;12(8).
23. Salfer B, Havo D, Kuppinger S, Wong DTW, Li F, Zhang L. Evaluating Pre-Analytical Variables for Saliva Cell-Free DNA Liquid Biopsy. *Diagnostics (Basel)*. 2023;13(10).
24. Hyun KA, Gwak H, Lee J, Kwak B, Jung HI. Salivary Exosome and Cell-Free DNA for Cancer Detection. *Micromachines (Basel)*. 2018;9(7).
25. Yao RA, Akinrinade O, Chaix M, Mital S. Quality of whole genome sequencing from blood versus saliva derived DNA in cardiac patients. *BMC Med Genomics*. 2020;13(1):11.
26. Shen Y, Risch H, Lu L, Ma X, Irwin ML, Lim JK, et al. Risk factors for hepatocellular carcinoma (HCC) in the northeast of the United States: results of a case-control study. *Cancer Causes Control*. 2020;31(4):321-32.
27. Inc. DG. Laboratory protocol for manual purification of DNA. <https://www.dnagenotek.com/row/pdf/PD-PR-006.pdf>2018.
28. Scientific T. Interpretation of Nucleic Acid 260/280 Ratios. Wilmington, DE: Thermo Scientific; 2012.
29. Wilfinger WW, Mackey K, Chomczynski P. Effect of pH and ionic strength on the spectrophotometric assessment of nucleic acid purity. *Biotechniques*. 1997;22(3):474-6, 8-81.
30. Lee B, Keyes E, Rachocki C, Grimes B, Chen E, Vittinghoff E, et al. Increased Colorectal Cancer Screening Sustained with Mailed Fecal Immunochemical Test Outreach. *Clin Gastroenterol Hepatol*. 2022;20(6):1326-33 e4.
31. Davis MM, Coury J, Larson JH, Gunn R, Towey EG, Ketelhut A, et al. Improving colorectal cancer screening in rural primary care: Preliminary effectiveness and implementation of a collaborative mailed fecal immunochemical test pilot. *J Rural Health*. 2023;39(1):279-90.
32. Conn ME, Kennedy-Rea S, Subramanian S, Baus A, Hoover S, Cunningham C, et al. Cost and Effectiveness of Reminders to Promote Colorectal Cancer Screening Uptake in Rural Federally Qualified Health Centers in West Virginia. *Health Promot Pract*. 2020;21(6):891-7.

33. Xu RH, Wei W, Krawczyk M, Wang W, Luo H, Flagg K, et al. Circulating tumour DNA methylation markers for diagnosis and prognosis of hepatocellular carcinoma. *Nat Mater*. 2017;16(11):1155-61.
34. Zhang YJ, Wu HC, Shen J, Ahsan H, Tsai WY, Yang HI, et al. Predicting hepatocellular carcinoma by detection of aberrant promoter methylation in serum DNA. *Clin Cancer Res*. 2007;13(8):2378-84.
35. Hlady RA, Zhou D, Puszyk W, Roberts LR, Liu C, Robertson KD. Initiation of aberrant DNA methylation patterns and heterogeneity in precancerous lesions of human hepatocellular cancer. *Epigenetics*. 2017;12(3):215-25.
36. Christiansen C, Castillo-Fernandez JE, Domingo-Relloso A, Zhao W, El-Sayed Moustafa JS, Tsai PC, et al. Novel DNA methylation signatures of tobacco smoking with trans-ethnic effects. *Clin Epigenetics*. 2021;13(1):36.
37. Xu K, Montalvo-Ortiz JL, Zhang X, Southwick SM, Krystal JH, Pietrzak RH, et al. Epigenome-Wide DNA Methylation Association Analysis Identified Novel Loci in Peripheral Cells for Alcohol Consumption Among European American Male Veterans. *Alcohol Clin Exp Res*. 2019;43(10):2111-21.
38. Innes H, Nahon P. Statistical perspectives on using hepatocellular carcinoma risk models to inform surveillance decisions. *J Hepatol*. 2023;79(5):1332-7.
39. Pepe MS, Etzioni R, Feng Z, Potter JD, Thompson ML, Thornquist M, et al. Phases of biomarker development for early detection of cancer. *J Natl Cancer Inst*. 2001;93(14):1054-61.

## **DNA Samples**

**DNA Quantity**  
12 HCC  
12 Controls

**DNA Purity**  
12 HCC  
12 Controls

**Samples Analyzed**  
12 HCC  
12 Controls

## **Methylation Arrays**

**Potential CpG Probes**  
850,000

**Background  
Subtraction**  
**Normalization to  
Internal Controls**

**Interpretable  
Probes**  
828,924 (97.5%)

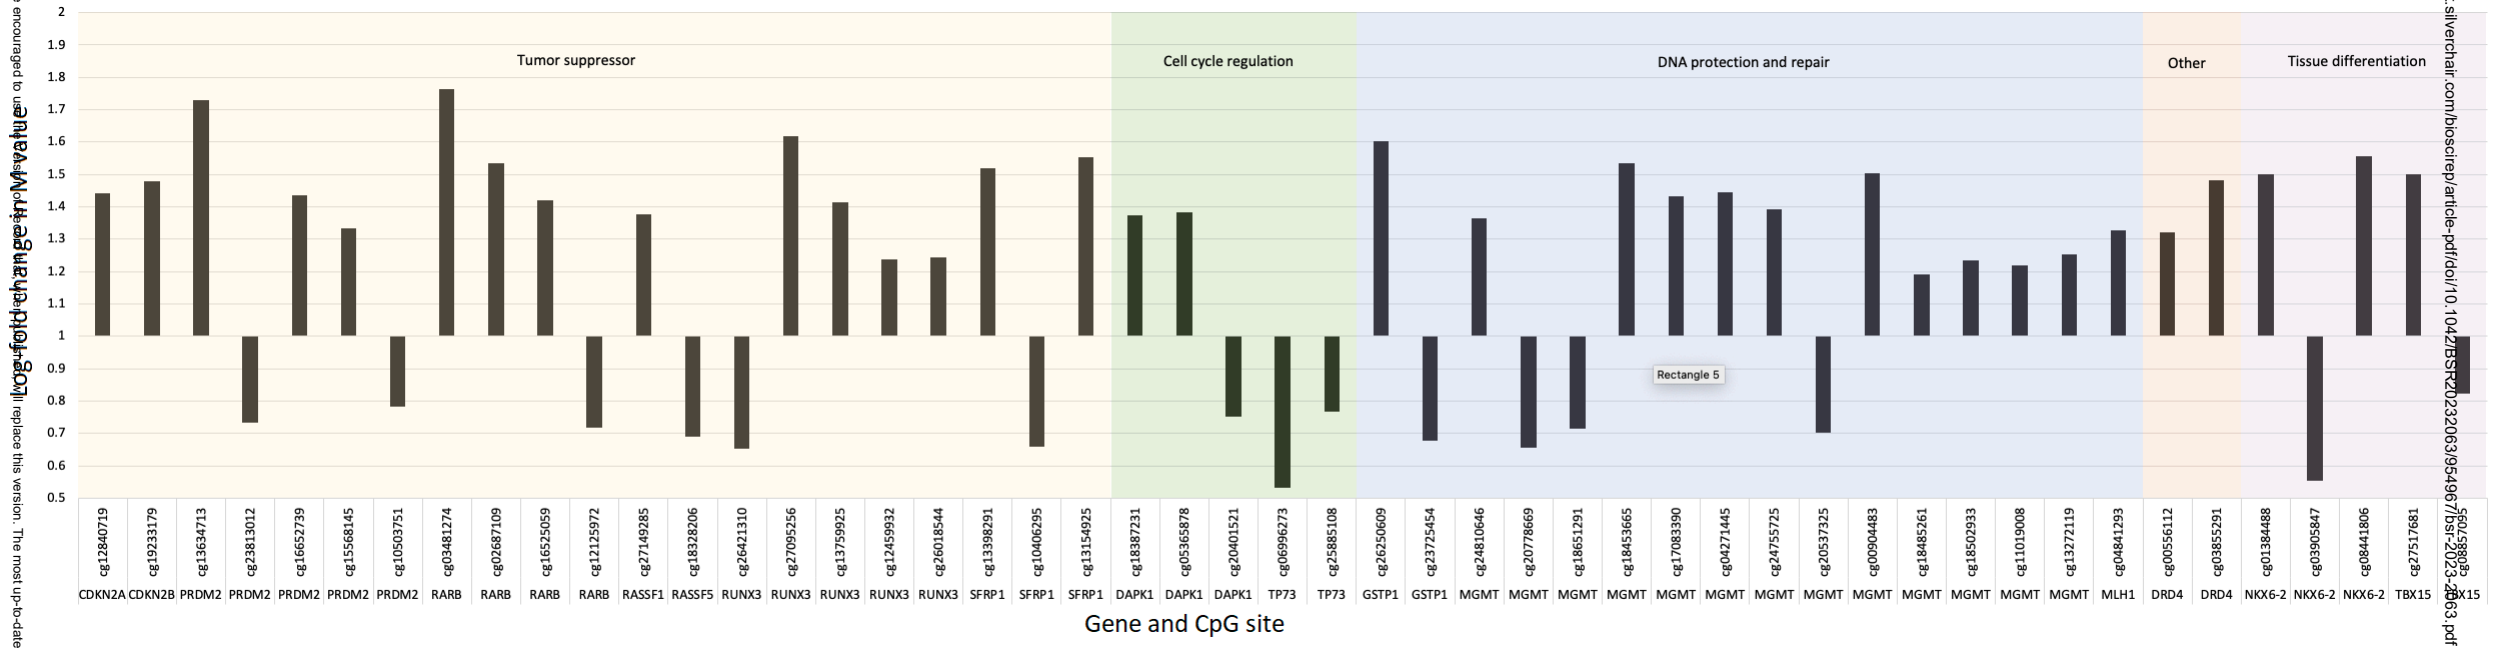

Source: https://port.silverchair.com/bioscirep/article-pdf/doi/10.1042/BSR20232063/954967/bsr-2023-2063.pdf
